# Supplementary material
Source: Springer Nature journal article supplement (https://www.springermedizin.de/resource/supplementary/13024_2012_361_MOESM7_ESM.pdf/9643816)

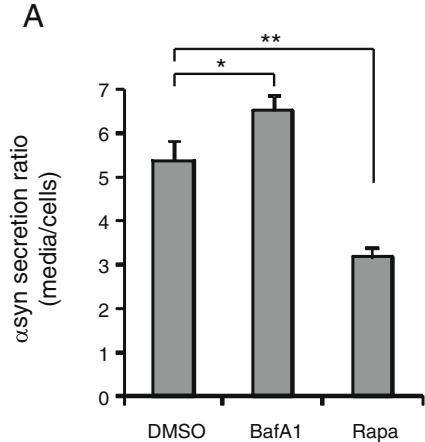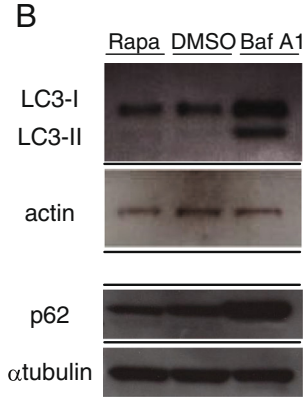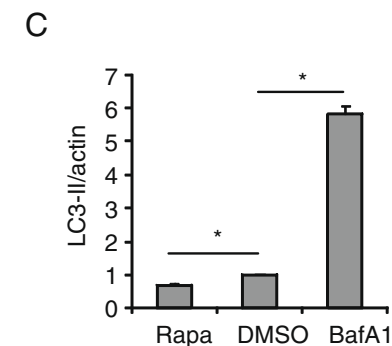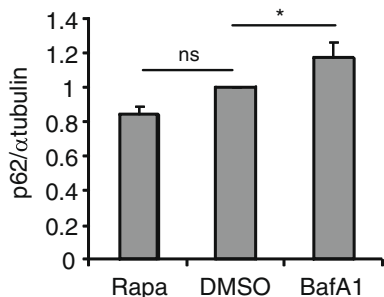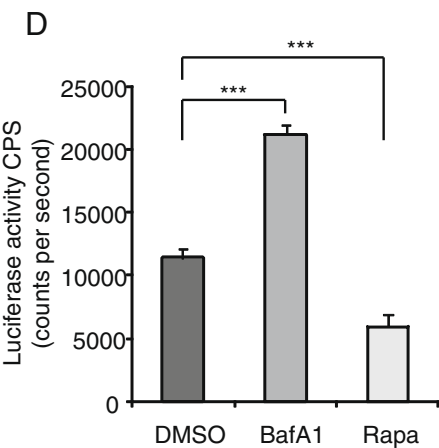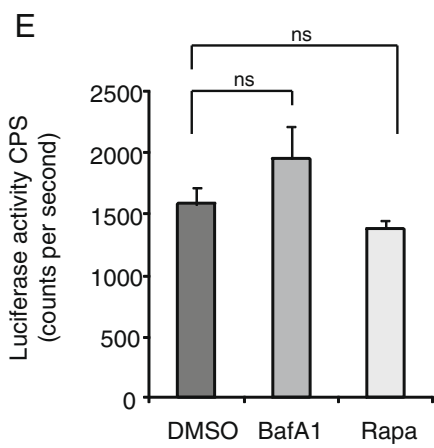

Supplement: MOESM7 [file 9643816]
